# Supplementary material for: Unique cellular immune signatures of multisystem inflammatory syndrome in children
Source: PubMed Central journal article supplement (PMC9629618; doi:10.1371/journal.ppat.1010915), 2022-11-02

S3. Fig.

# Gating Strategy for Myeloid cell subsets

(A)

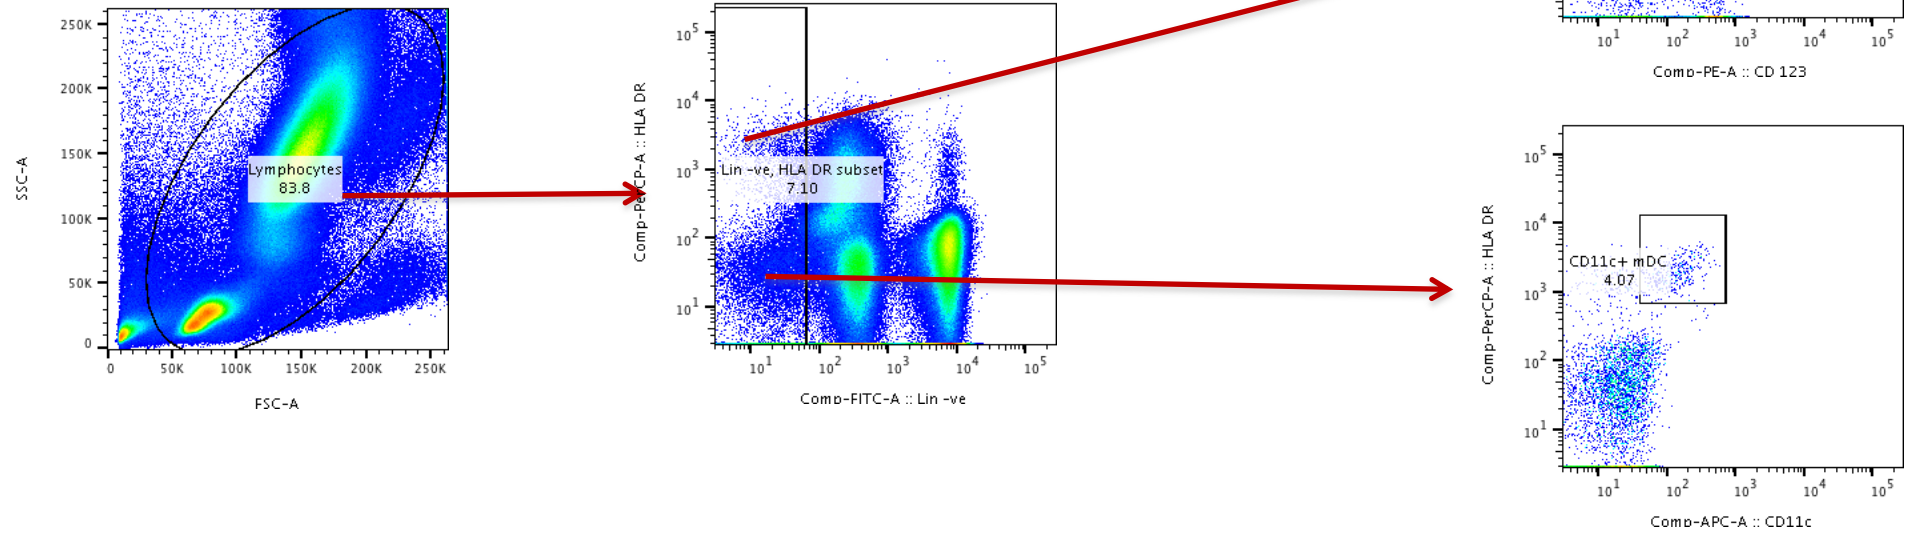

(B)

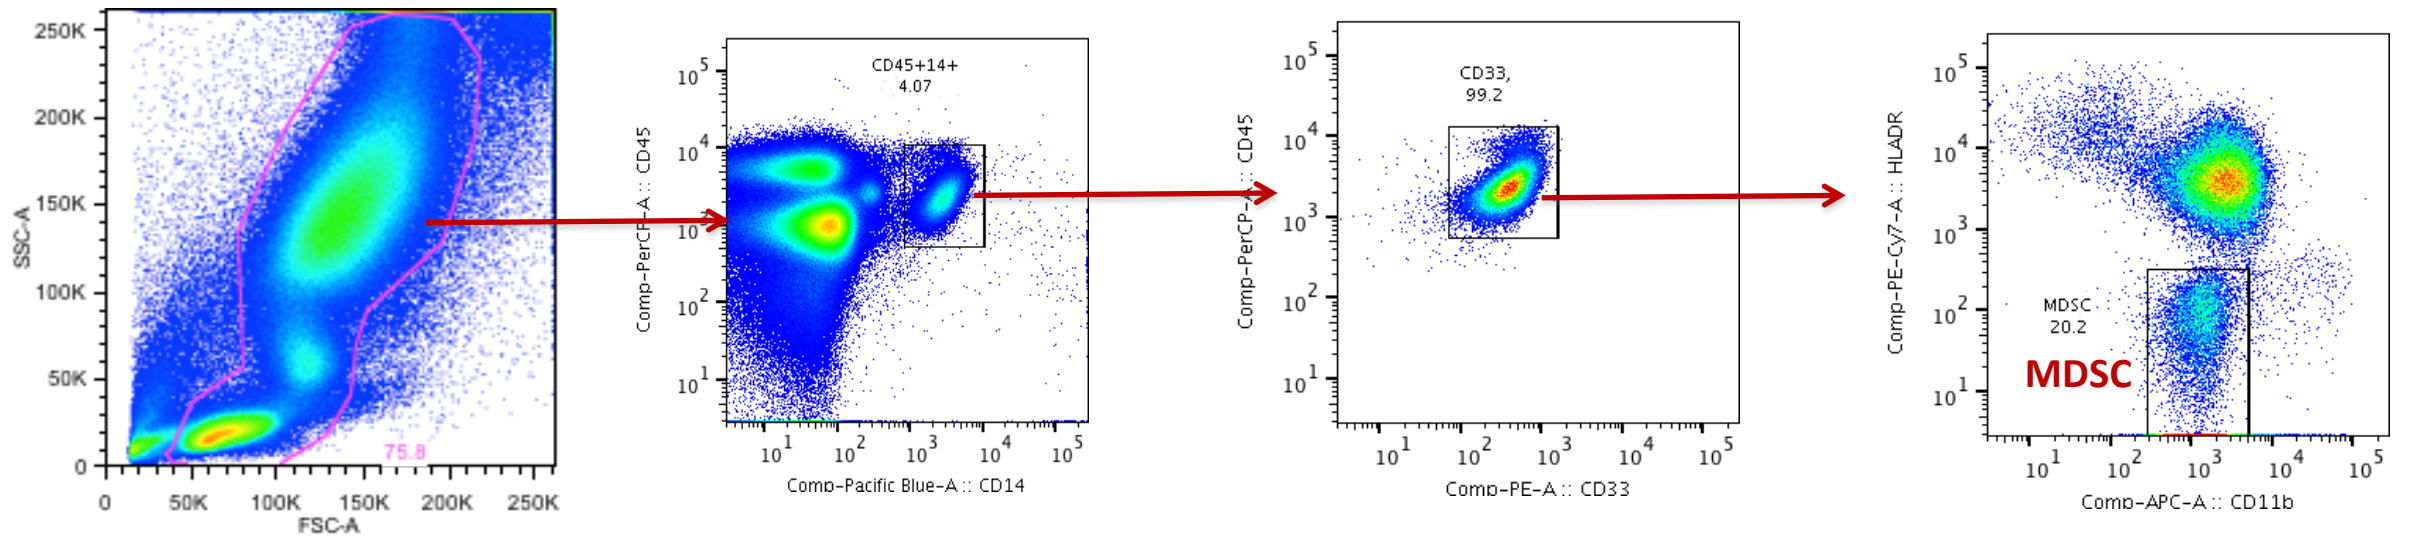

(C)

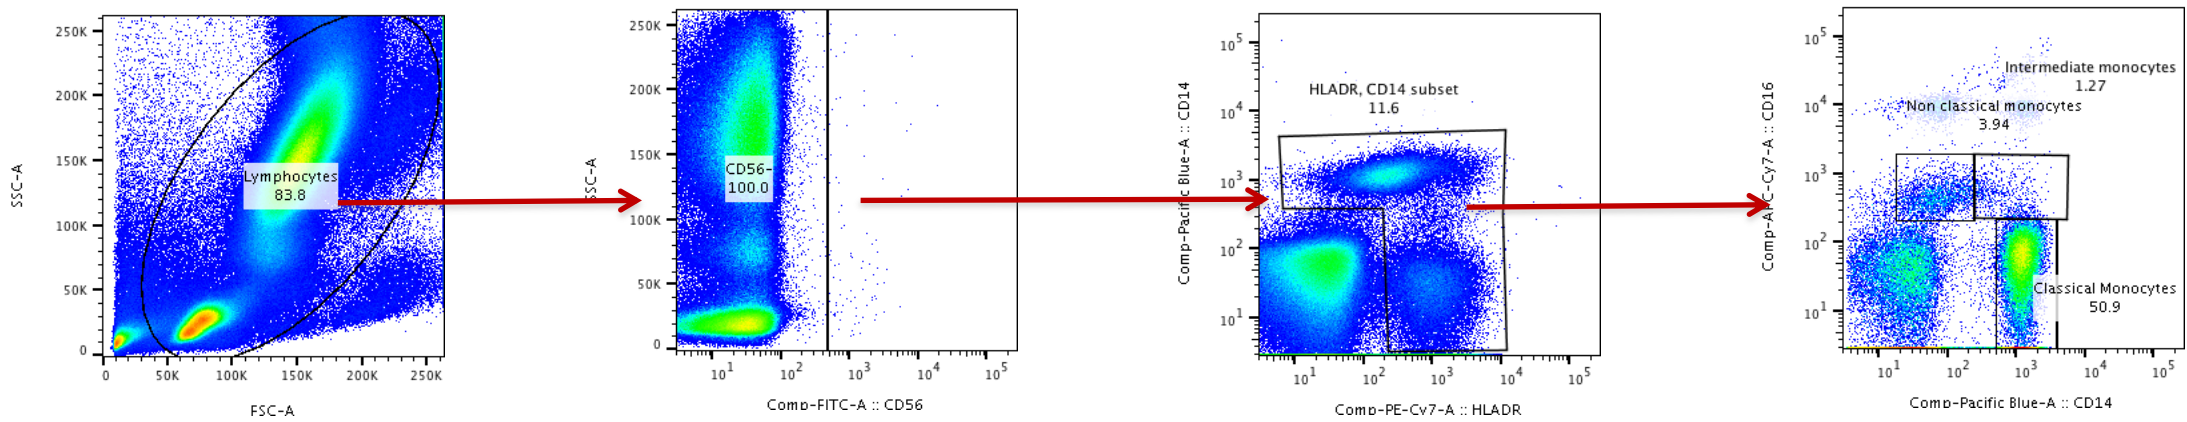

Supplement: ppat.1010915.s003.pdf [file ppat.1010915.s003.pdf]
