# Supplementary material for: Unique cellular immune signatures of multisystem inflammatory syndrome in children
Source: PubMed Central journal article supplement (PMC9629618; doi:10.1371/journal.ppat.1010915), 2022-11-02

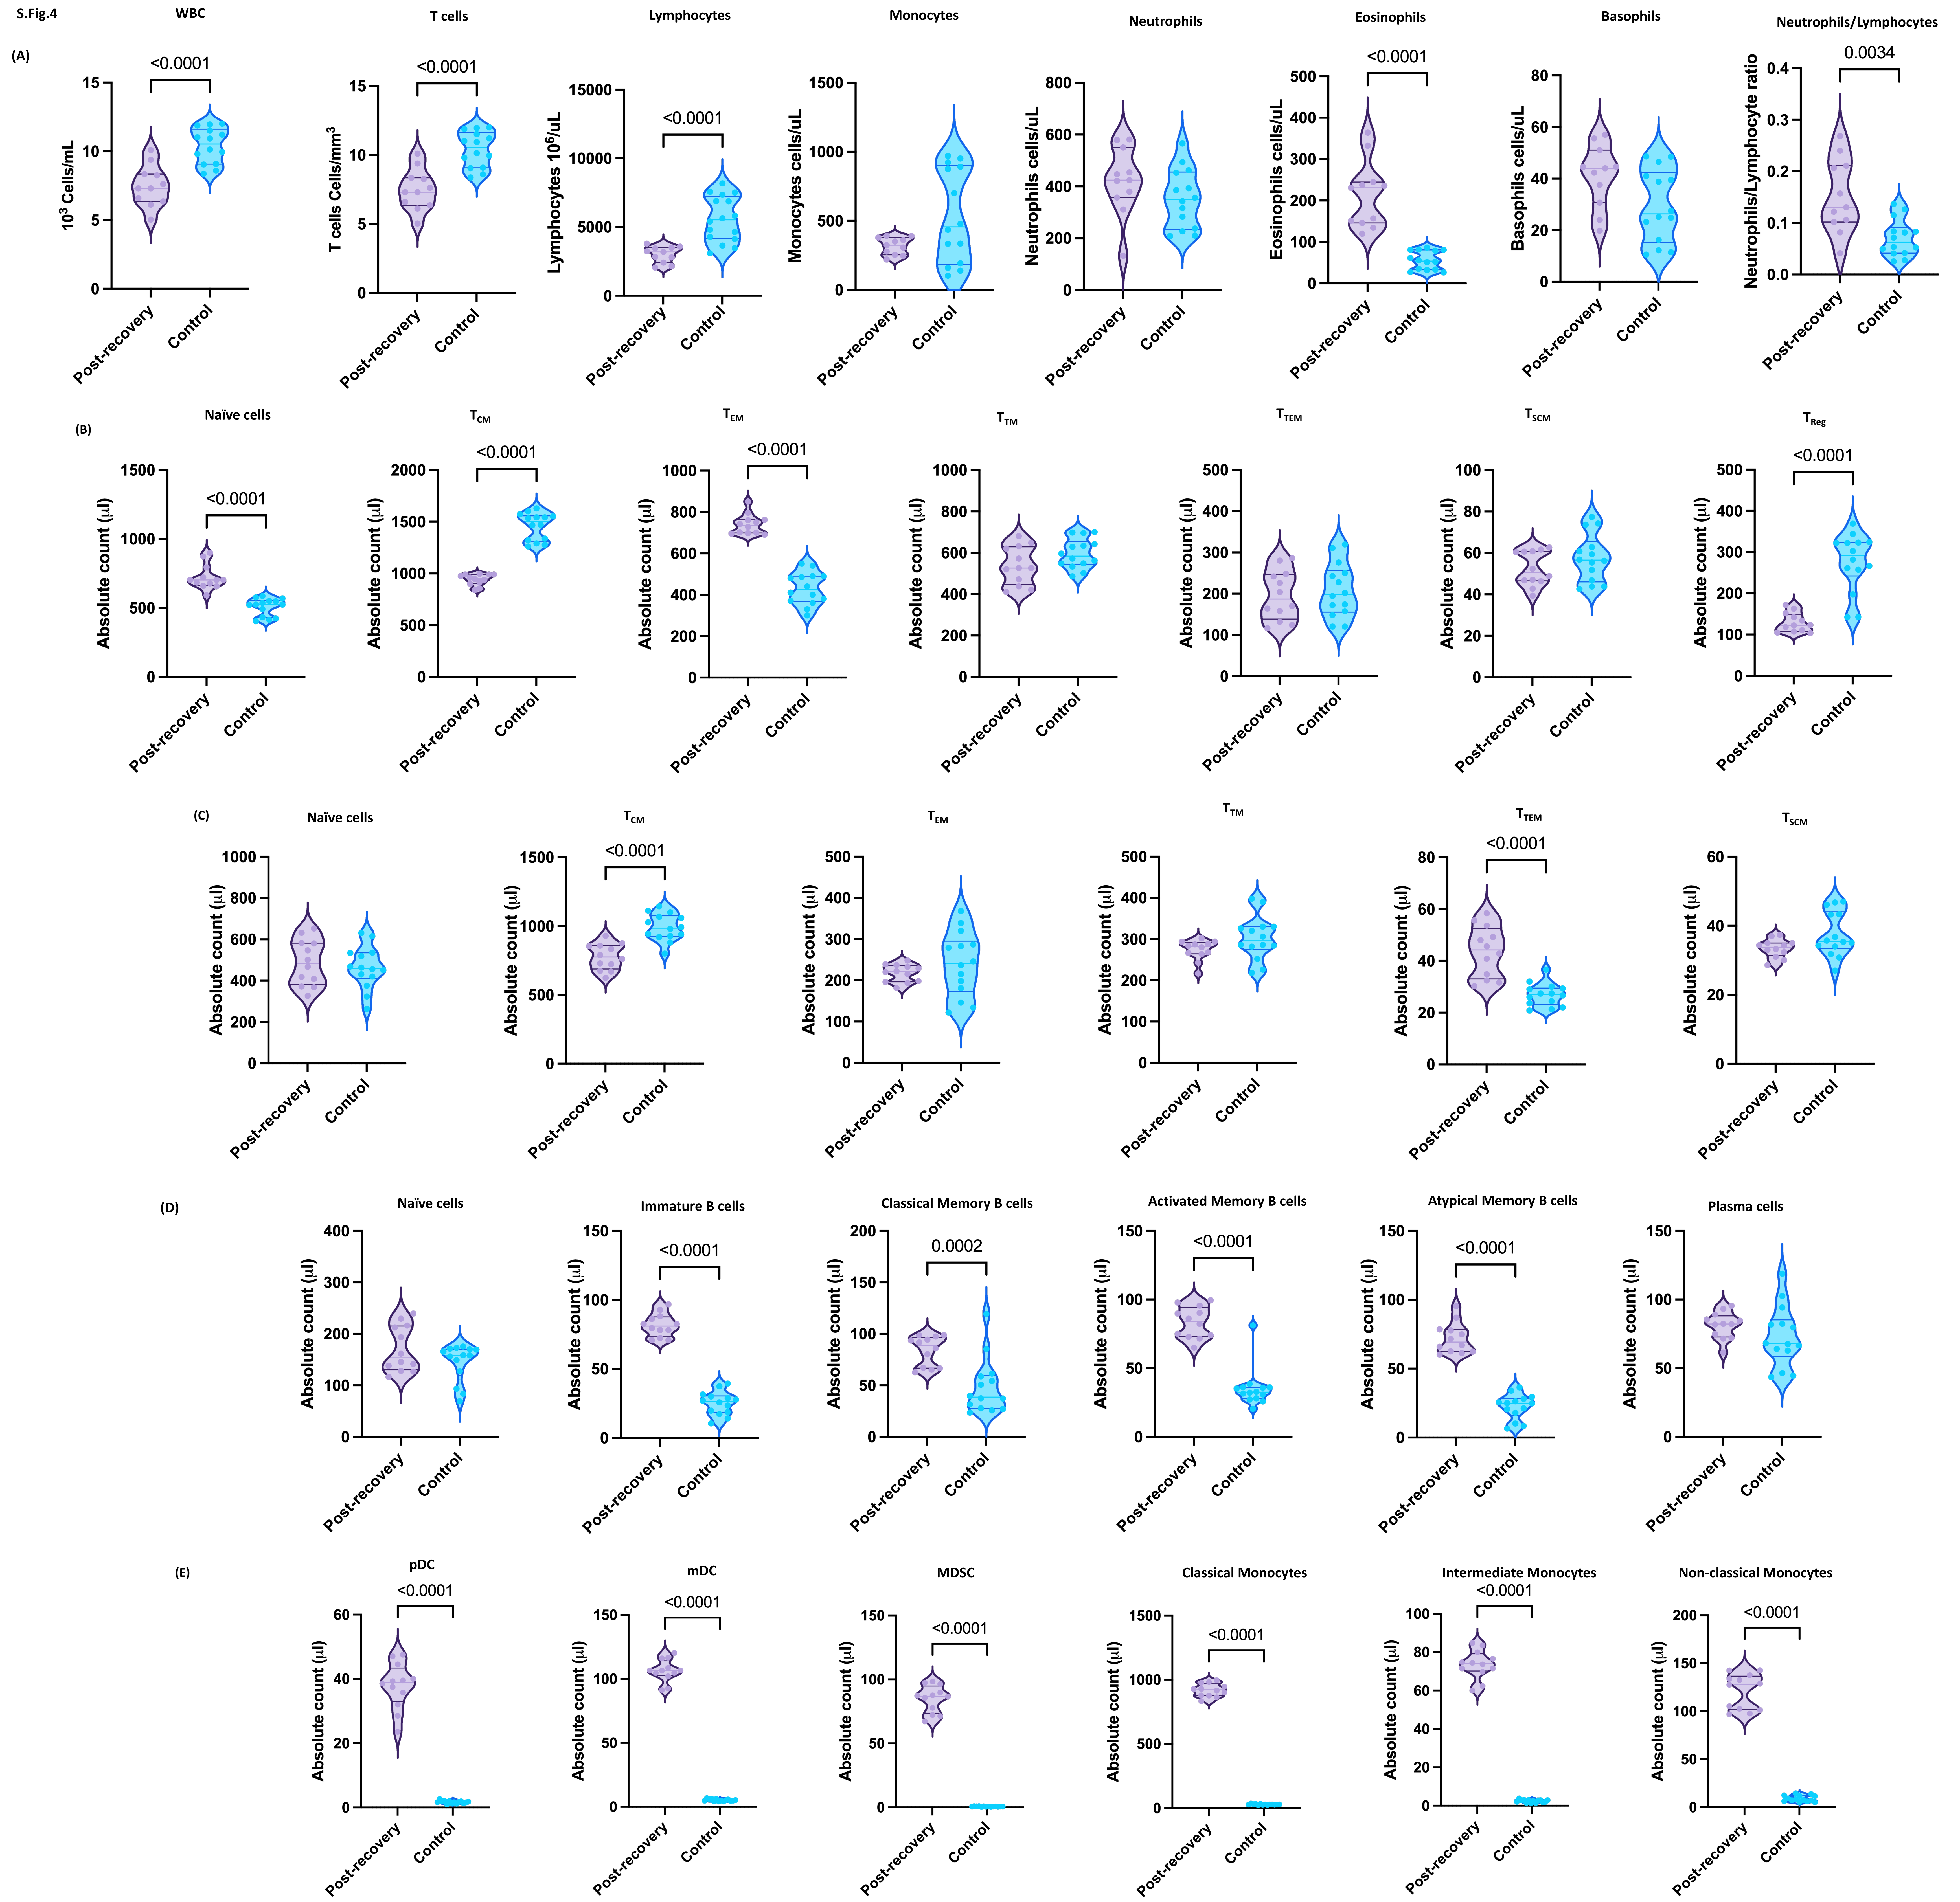

Supplement: ppat.1010915.s004.pdf [file ppat.1010915.s004.pdf]
